# Supplementary material
Source: PubMed Central journal article supplement (PMC10014930)
Supplement: NIHMS1860697-supplement-1.pdf [file NIHMS1860697-supplement-1.pdf]

**Supplementary Materials for  
“The effect direction should be taken into account when  
assessing small-study effects”**

## Comparisons of Sample Sizes in Studies on Dental Research and General Medicine

**Table S1. Summary of sample sizes of studies from the *Journal of Evidence-Based Dental Practice (JEBDP)* and *The BMJ*.** The studies are published or available online between January 1, 2021 and August 10, 2022.

|              | No. of systematic reviews | No. of included studies | No. of excluded studies <sup>b</sup> | Summary of sample sizes |        |     |
|--------------|---------------------------|-------------------------|--------------------------------------|-------------------------|--------|-----|
|              |                           |                         |                                      | Q1                      | Median | Q3  |
| <i>JEBDP</i> | 34                        | 519 <sup>a</sup>        | 3                                    | 36                      | 65     | 152 |
| <i>BMJ</i>   | 48                        | 4449                    | 57                                   | 58                      | 170    | 552 |

<sup>a</sup>424 studies reported the number of participants, 28 studies reported the number of teeth, 55 studies reported the number of implants, and 12 studies reported the number of sites.

<sup>b</sup>Some studies were excluded because sample sizes were not specified.

## Additional Simulation Results

**Table S2. Type I error rates in case 0 (C0) and power in cases 1, 2, and 3 (C1, C2, and C3), expressed as percentages, for various tests for small-study effects in scenario 1.** The nominal significance level is 0.1. Note:  $n$  is the number of published studies in each meta-analysis;  $k$  is the average number of simulated studies in total among all replications to obtain  $n$  published studies;  $I^2$  is the average heterogeneity measure among all replications; the compared tests include the two-sided Egger's test (Reg: two-sided), the two-sided modified regression test (Reg-het: two-sided), Begg's rank test (Rank: two-sided), the trim-and-fill method (T & F), the proposed one-sided Egger's test (Reg: one-sided), and the proposed one-sided modified regression test (Reg-het: one-sided).

| Test               | $\pi = 0$ |      |       |       | $\pi = 1$ |      |      |       | $\pi = 4$ |      |       |       |
|--------------------|-----------|------|-------|-------|-----------|------|------|-------|-----------|------|-------|-------|
|                    | C0        | C1   | C2    | C3    | C0        | C1   | C2   | C3    | C0        | C1   | C2    | C3    |
| $n = 15$           |           |      |       |       |           |      |      |       |           |      |       |       |
| $k$                | 15.0      | 24.2 | 30.0  | 52.4  | 15.0      | 24.2 | 29.9 | 52.4  | 15.0      | 24.2 | 29.9  | 52.4  |
| $I^2$              | 9.9       | 3.2  | 1.9   | 7.9   | 18.5      | 9.6  | 5.7  | 15.3  | 74.2      | 69.0 | 58.1  | 68.6  |
| Reg: two-sided     | 10.2      | 16.3 | 28.1  | 20.2  | 10.5      | 14.6 | 22.1 | 17.8  | 13.3      | 13.5 | 13.3  | 13.7  |
| Reg-het: two-sided | 9.7       | 15.8 | 27.8  | 19.3  | 9.7       | 13.7 | 21.5 | 17.0  | 10.5      | 10.3 | 10.6  | 11.2  |
| Rank: two-sided    | 8.0       | 12.2 | 22.2  | 15.5  | 7.6       | 10.0 | 16.4 | 12.7  | 9.8       | 9.4  | 10.0  | 10.3  |
| T & F              | 6.3       | 14.2 | 24.3  | 17.1  | 6.4       | 12.1 | 19.0 | 14.6  | 4.6       | 3.2  | 7.2   | 3.4   |
| Reg: one-sided     | 9.9       | 25.2 | 42.7  | 31.6  | 10.5      | 21.8 | 33.7 | 27.7  | 12.0      | 14.5 | 16.7  | 16.0  |
| Reg-het: one-sided | 9.7       | 25.0 | 42.4  | 30.8  | 10.1      | 21.1 | 33.4 | 27.0  | 9.8       | 12.9 | 15.2  | 15.0  |
| $n = 30$           |           |      |       |       |           |      |      |       |           |      |       |       |
| $k$                | 30.0      | 48.4 | 59.9  | 104.9 | 30.0      | 48.4 | 59.9 | 104.6 | 30.0      | 48.5 | 59.9  | 104.7 |
| $I^2$              | 7.6       | 1.5  | 0.7   | 5.4   | 18        | 7.8  | 3.4  | 13.9  | 77.3      | 73.3 | 63.3  | 72.8  |
| Reg: two-sided     | 9.9       | 23.8 | 46.6  | 33.8  | 10.2      | 19.1 | 36.4 | 26.6  | 13.2      | 13.6 | 14.9  | 13.8  |
| Reg-het            | 9.7       | 23.6 | 46.5  | 32.8  | 9.7       | 18.6 | 36.1 | 25.5  | 10.0      | 10.6 | 12.4  | 11.6  |
| Rank: two-sided    | 8.0       | 17.0 | 39.3  | 25.6  | 7.3       | 12.9 | 29.4 | 19.3  | 9.7       | 9.8  | 12.4  | 10.7  |
| T & F              | 6.7       | 19.4 | 26.2  | 24.4  | 6.9       | 14.9 | 21.3 | 18.9  | 6.3       | 3.1  | 5.6   | 3.3   |
| Reg: one-sided     | 10.0      | 36.5 | 61.7  | 48.6  | 10.1      | 29.4 | 50.3 | 39.7  | 12.0      | 15.8 | 19.5  | 17.8  |
| Reg-het: one-sided | 9.7       | 36.4 | 61.6  | 48.0  | 9.4       | 28.7 | 50.2 | 38.8  | 10.0      | 14.2 | 18.6  | 17.0  |
| $n = 50$           |           |      |       |       |           |      |      |       |           |      |       |       |
| $k$                | 50.0      | 80.6 | 100.0 | 174.7 | 50.0      | 80.8 | 99.9 | 174.5 | 50.0      | 80.7 | 100.1 | 174.5 |
| $I^2$              | 6.0       | 0.7  | 0.2   | 3.9   | 17.8      | 6.5  | 2.1  | 13.3  | 78.5      | 74.7 | 65.8  | 74.4  |
| Reg: two-sided     | 10.0      | 32.9 | 67.0  | 47.1  | 10.3      | 25.7 | 51.1 | 39.1  | 13.6      | 14.2 | 16.6  | 16.2  |
| Reg-het            | 9.8       | 32.9 | 66.9  | 46.6  | 9.5       | 24.9 | 51.0 | 38.2  | 10.3      | 11.1 | 14.2  | 13.9  |
| Rank: two-sided    | 7.9       | 26.0 | 60.8  | 36.7  | 7.8       | 17.1 | 44.9 | 30.2  | 10.8      | 10.3 | 15.1  | 12.7  |
| T & F              | 6.7       | 21.3 | 29.3  | 28.3  | 7.0       | 18.2 | 21.6 | 23.7  | 7.2       | 3.2  | 3.7   | 3.2   |
| Reg: one-sided     | 9.8       | 47.4 | 79.0  | 61.2  | 10.4      | 37.6 | 64.8 | 53.0  | 12.2      | 17.5 | 22.1  | 21.1  |
| Reg-het: one-sided | 9.6       | 47.3 | 79.0  | 60.8  | 9.7       | 37.1 | 64.5 | 52.5  | 10.6      | 15.9 | 21.9  | 21.1  |

**Table S3. Type I error rates ( $m = 0$ ) and power ( $m > 0$ ), expressed as percentages, for various tests for small-study effects in scenario 2.** The nominal significance level is 0.1. Note:  $n$  is the number of published studies in each meta-analysis;  $k$  is the average number of simulated studies in total among all replications to obtain  $n$  published studies;  $I^2$  is the average heterogeneity measure among all replications; the compared tests include the two-sided Egger's test (Reg: two-sided), the two-sided modified regression test (Reg-het: two-sided), Begg's rank test (Rank: two-sided), the trim-and-fill method (T & F), the proposed one-sided Egger's test (Reg: one-sided), and the proposed one-sided modified regression test (Reg-het: one-sided).

| Test               | $\pi = 0$ |         |         |         | $\pi = 1$ |         |         |         | $\pi = 4$ |         |         |         |
|--------------------|-----------|---------|---------|---------|-----------|---------|---------|---------|-----------|---------|---------|---------|
|                    | $m = 0$   | $[n/4]$ | $[n/3]$ | $[n/2]$ | $m = 0$   | $[n/4]$ | $[n/3]$ | $[n/2]$ | $m = 0$   | $[n/4]$ | $[n/3]$ | $[n/2]$ |
| <i>n</i> = 15      |           |         |         |         |           |         |         |         |           |         |         |         |
| <i>k</i>           | 15        | 18      | 20      | 22      | 15        | 18      | 20      | 22      | 15        | 18      | 20      | 22      |
| $I^2$              | 10.0      | 2.7     | 1.5     | 1.0     | 18.5      | 6.9     | 4.4     | 2.8     | 74.2      | 60.6    | 54.8    | 49.7    |
| Reg: two-sided     | 9.7       | 23.1    | 33.3    | 40.8    | 10.6      | 20.5    | 26.6    | 32.7    | 13.2      | 14.8    | 15.6    | 15.2    |
| Reg-het: two-sided | 9.3       | 22.6    | 33.0    | 40.5    | 9.9       | 19.7    | 25.9    | 32.1    | 9.7       | 10.8    | 11.4    | 11.7    |
| Rank: two-sided    | 7.8       | 16.9    | 23.3    | 30.1    | 7.5       | 13.5    | 18.6    | 23.5    | 9.5       | 9.8     | 10.9    | 11.3    |
| T & F              | 5.9       | 34.1    | 50.0    | 59.3    | 6.3       | 32.8    | 44.3    | 53.2    | 4.9       | 19.8    | 26.0    | 32.0    |
| Reg: one-sided     | 9.6       | 36.0    | 48.1    | 56.1    | 10.2      | 30.9    | 39.1    | 46.5    | 11.9      | 17.6    | 19.4    | 20.7    |
| Reg-het: one-sided | 9.3       | 35.6    | 47.7    | 55.9    | 9.8       | 30.2    | 38.5    | 46.2    | 9.5       | 14.7    | 15.9    | 17.7    |
| <i>n</i> = 30      |           |         |         |         |           |         |         |         |           |         |         |         |
| <i>k</i>           | 30        | 37      | 40      | 45      | 30        | 37      | 40      | 45      | 30        | 37      | 40      | 45      |
| $I^2$              | 7.6       | 0.7     | 0.5     | 0.2     | 18.3      | 3.8     | 2.2     | 0.8     | 77.5      | 63.1    | 59.1    | 52.8    |
| Reg: two-sided     | 10.1      | 47.0    | 58.6    | 71.2    | 10.5      | 36.1    | 45.3    | 55.0    | 13.6      | 16.8    | 16.6    | 18.5    |
| Reg-het            | 9.7       | 47.0    | 58.4    | 71.1    | 9.3       | 36.0    | 45.0    | 54.8    | 9.8       | 12.8    | 13.1    | 14.6    |
| Rank: two-sided    | 7.4       | 35.9    | 47.1    | 59.8    | 7.1       | 27.8    | 36.0    | 46.2    | 9.8       | 14.3    | 16.0    | 18.1    |
| T & F              | 6.4       | 77.2    | 88.1    | 94.7    | 6.4       | 72.7    | 82.9    | 91.1    | 6.5       | 55.0    | 65.2    | 73.4    |
| Reg: one-sided     | 10.2      | 61.4    | 72.2    | 82.0    | 10.4      | 50.1    | 59.5    | 68.9    | 12.0      | 21.7    | 23.0    | 25.0    |
| Reg-het: one-sided | 10.0      | 61.4    | 72.2    | 82.1    | 10.0      | 50.2    | 59.5    | 69.0    | 10.2      | 19.5    | 20.8    | 22.6    |
| <i>n</i> = 50      |           |         |         |         |           |         |         |         |           |         |         |         |
| <i>k</i>           | 50        | 62      | 66      | 75      | 50        | 62      | 66      | 75      | 50        | 62      | 66      | 75      |
| $I^2$              | 6.1       | 0.2     | 0.1     | 0.0     | 17.9      | 2.1     | 1.3     | 0.3     | 78.6      | 64.5    | 61.2    | 54.8    |
| Reg: two-sided     | 10.3      | 66.6    | 77.6    | 88.5    | 10.9      | 54.0    | 61.8    | 74.4    | 13.4      | 18.1    | 19.7    | 21.6    |
| Reg-het            | 10.0      | 66.7    | 77.6    | 88.5    | 10.0      | 54.0    | 62.1    | 74.3    | 9.9       | 15.5    | 16.1    | 18.7    |
| Rank: two-sided    | 8.3       | 57.3    | 69.5    | 83.4    | 7.0       | 46.5    | 55.4    | 70.6    | 9.8       | 20.6    | 23.0    | 28.0    |
| T & F              | 6.7       | 95.9    | 98.5    | 99.9    | 6.9       | 94.3    | 97.5    | 99.5    | 6.8       | 84.6    | 89.3    | 94.7    |
| Reg: one-sided     | 9.6       | 78.3    | 86.8    | 94.5    | 10.4      | 67.1    | 74.5    | 84.7    | 11.6      | 24.4    | 27.0    | 29.8    |
| Reg-het: one-sided | 9.5       | 78.3    | 86.8    | 94.5    | 9.9       | 67.4    | 74.7    | 84.9    | 10.0      | 23.2    | 24.5    | 28.4    |

## Forest Plots of Meta-Analyses Presented in the Main Content

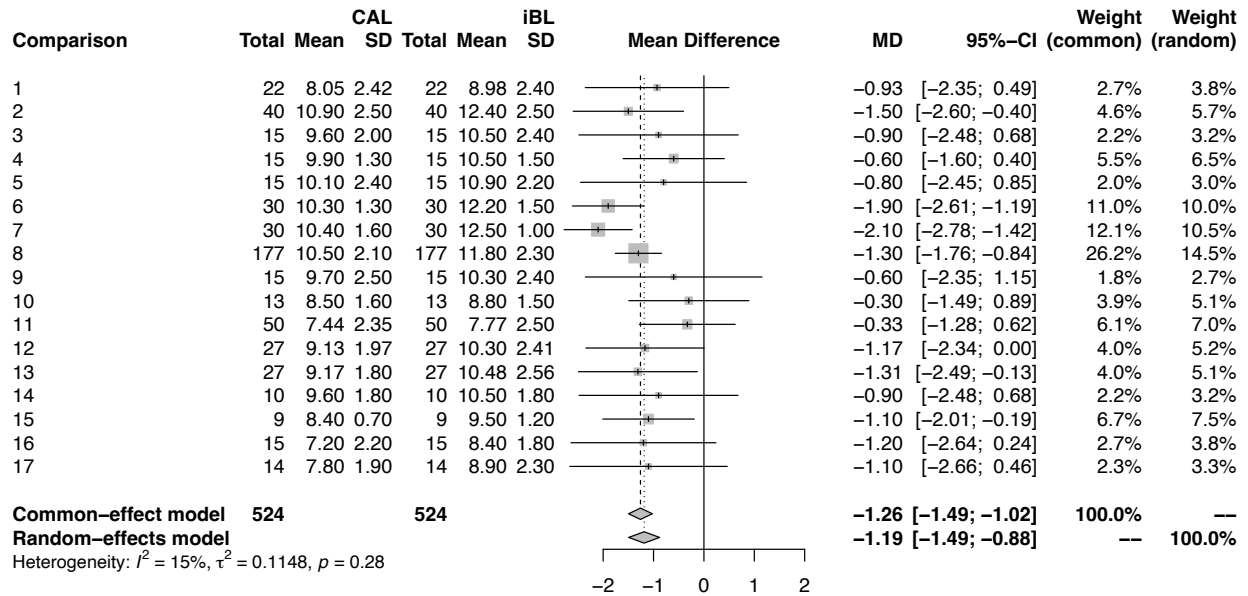

**Figure S1. Forest plot of the meta-analysis comparing clinical attachment level (CAL) and intraoperative bone level (iBL) of periodontal infrabony defects.**

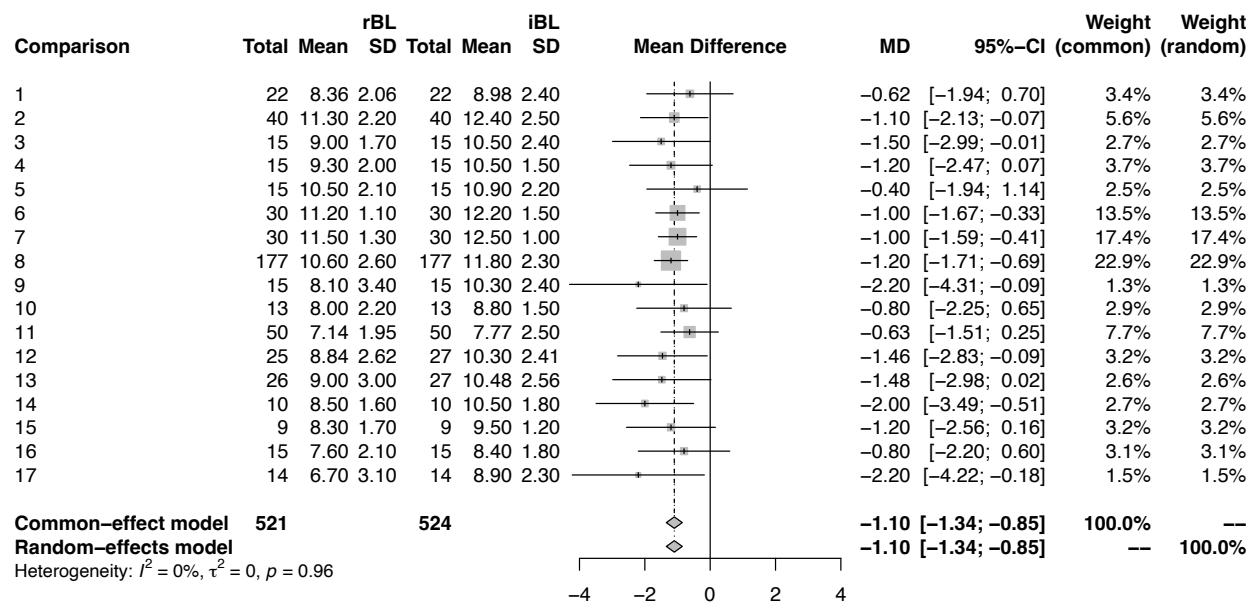

**Figure S2. Forest plot of the meta-analysis comparing radiographic bone level (rBL) and intraoperative bone level (iBL) of periodontal infrabony defects.**

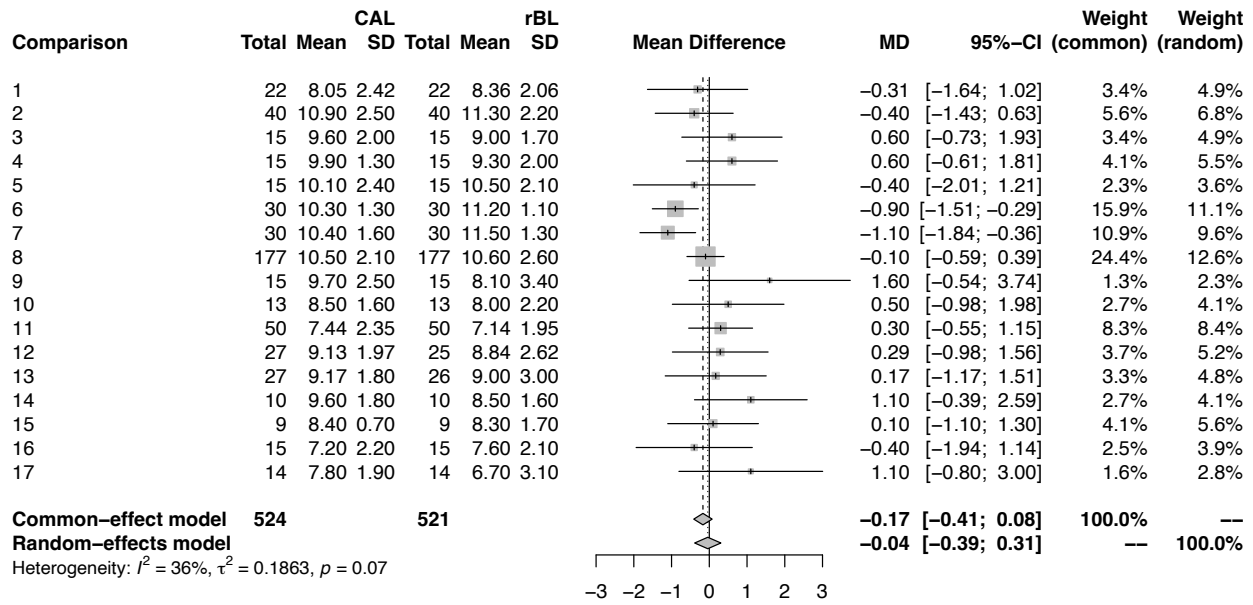

**Figure S3. Forest plot of the meta-analysis comparing clinical attachment level (CAL) and radiographic bone level (rBL) of periodontal infrabony defects.**

## Supplementary Case Studies on COVID-19

We further illustrate the performance of the various methods for assessing small-study effects by three meta-analyses on COVID-19. The first supplementary meta-analysis conducted by Lee et al.<sup>1</sup> investigated the efficacy of COVID-19 vaccines in immunocompromised patients by evaluating the seroconversion among patients with hematological cancers compared with immunocompetent controls after the second dose of COVID-19 vaccine. It consists of 19 studies with risk ratios reported. The second supplementary meta-analysis conducted by Chu et al.<sup>2</sup> investigated the effect of exposure proximity on the infection of COVID-19, SARS, or MERS. It consists of 32 studies with relative risks reported. The third supplementary meta-analysis conducted by Peckham et al.<sup>3</sup> investigated the effect of the risk factor of sex on mortality in patients with COVID-19. It consists of 70 studies with odds ratios reported.

We reperformed the three meta-analyses with complete data; the REML method was used to obtain  $\tau^2$  in the random-effects model. Figures S4–S6 present their forest plots. Figure S7 presents the three meta-analyses' contour-enhanced funnel plots for visually assessing small-study effects. Table S4 presents the proposed one-sided regression tests along with the other competitors for assessing small-study effects. The side of missing studies was determined by Egger's regression test. The conclusions are generally consistent with the case studies on dental research presented in the main content.



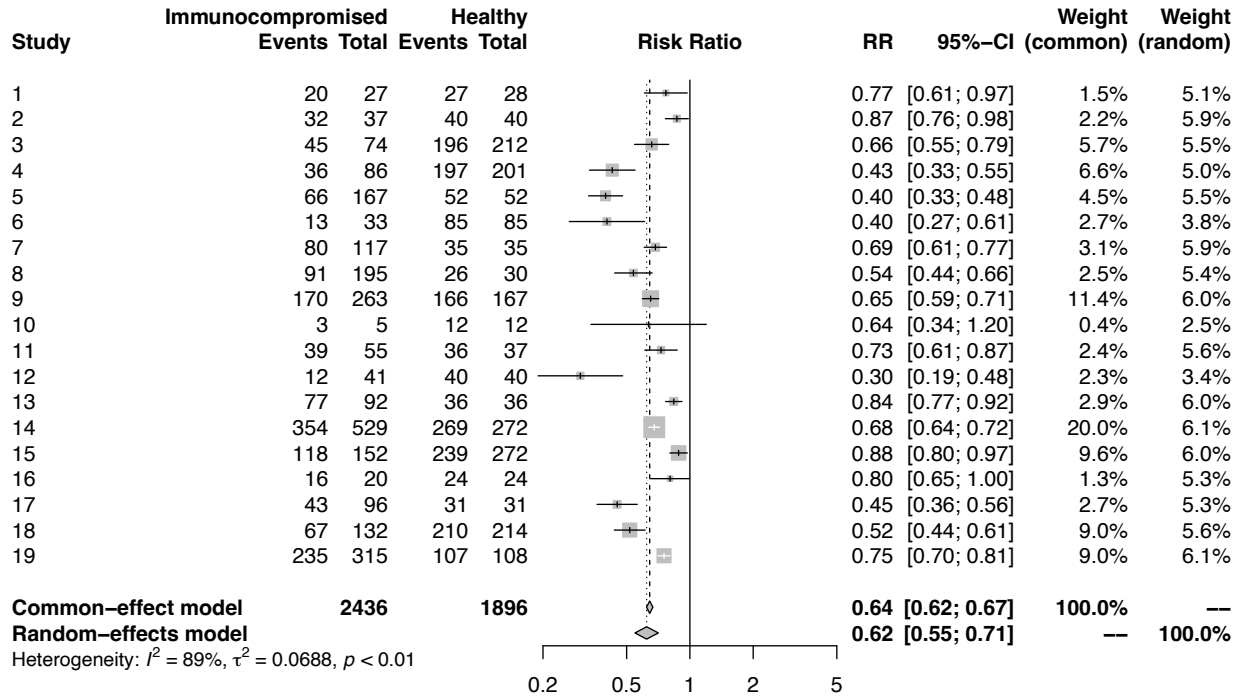

**Figure S4. Forest plot of the meta-analysis in Lee et al.<sup>1</sup>** The meta-analysis investigated the efficacy of COVID-19 vaccines in immunocompromised patients after the second dose.

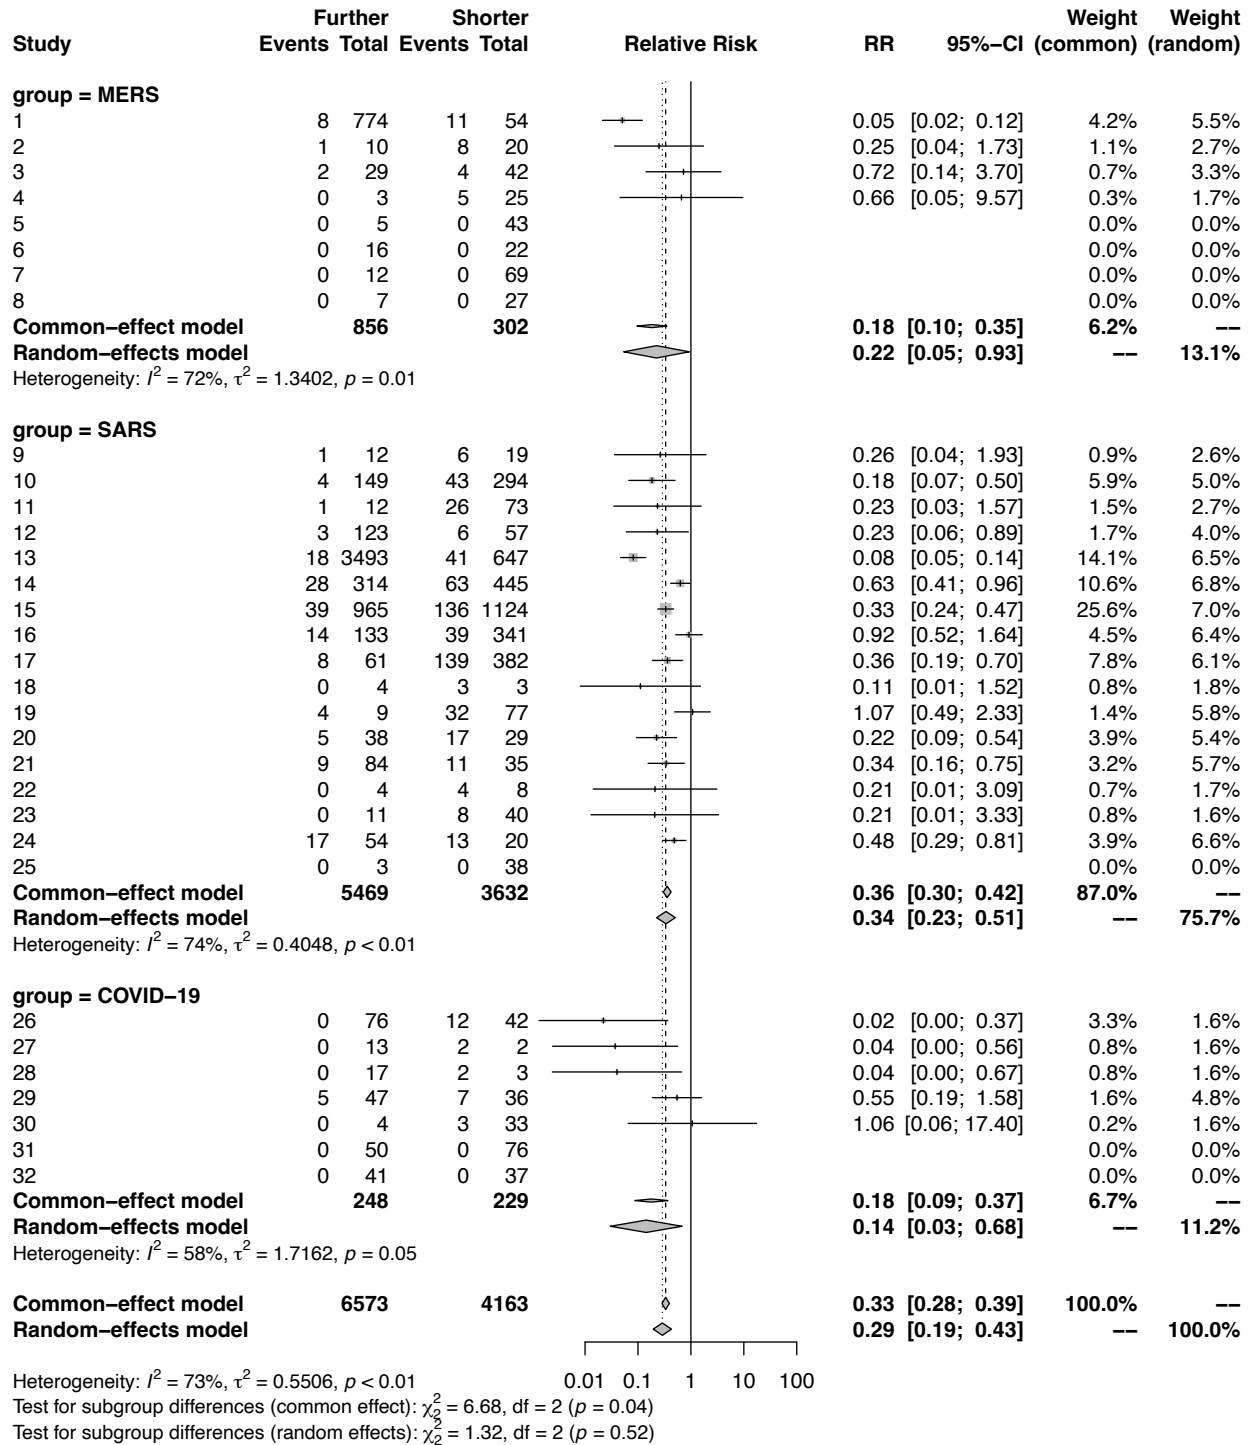

**Figure S5. Forest plot of the meta-analysis in Chu et al.<sup>2</sup>** The meta-analysis investigated the effect of exposure proximity on the infection of COVID-19, SARS, or MERS.

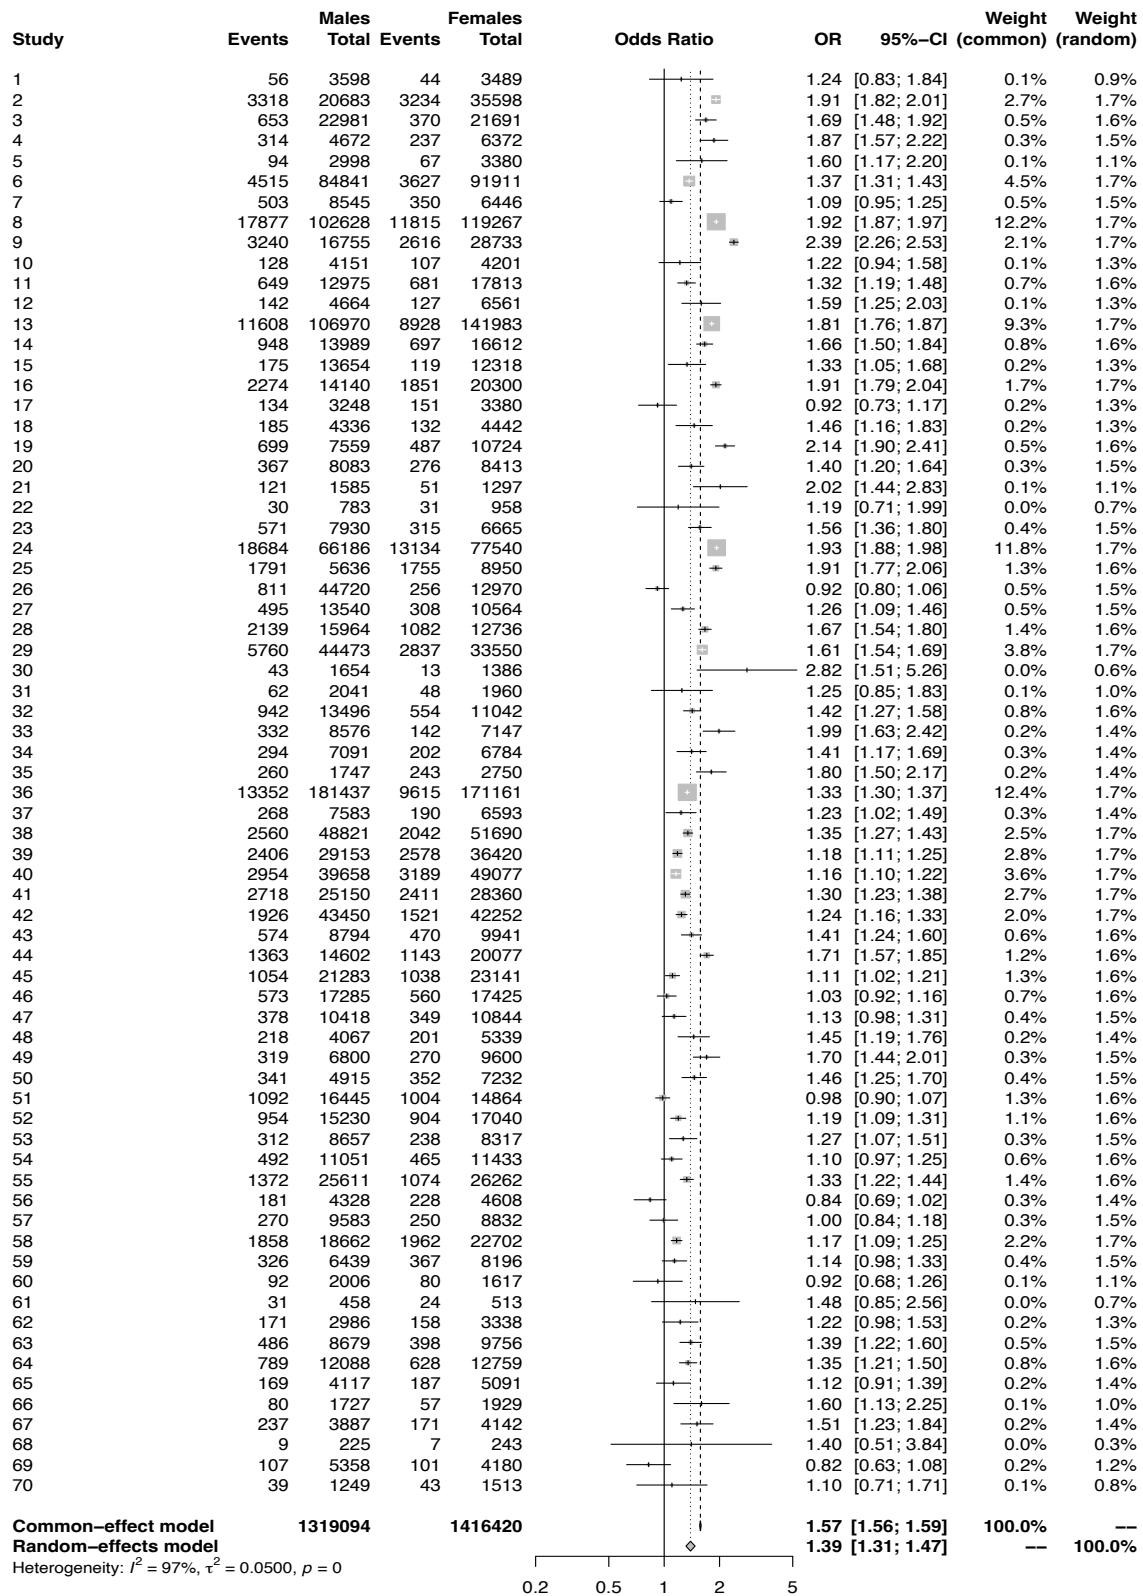

**Figure S6. Forest plot of the meta-analysis in Peckham et al.<sup>3</sup>** The meta-analysis investigated the effect of the risk factor of the male sex on mortality in patients with COVID-19.

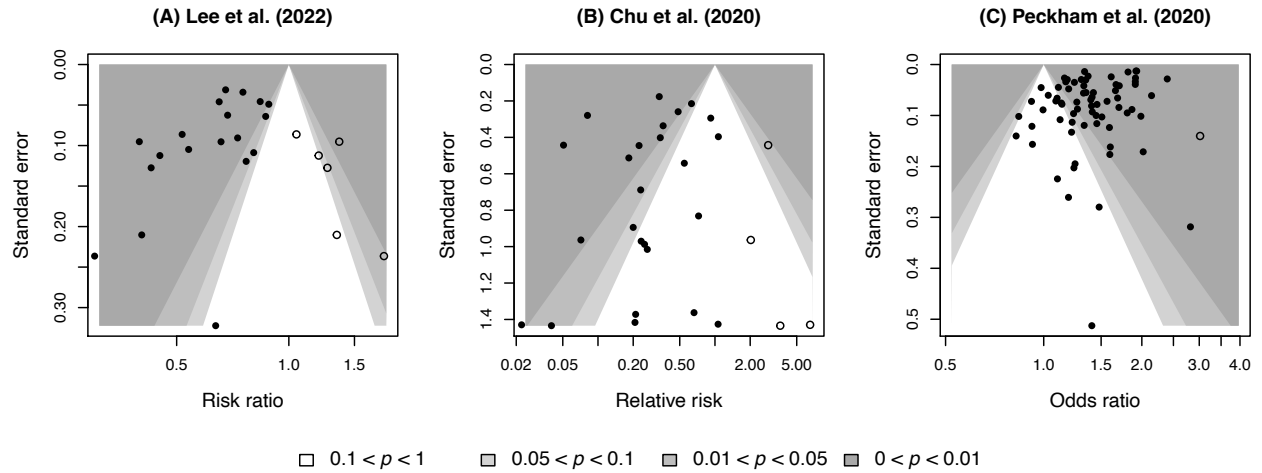

**Figure S7. Contour-enhanced funnel plots for the three supplementary meta-analyses on COVID-19.** The filled points represent published data; the unfilled points represent imputed missing studies by the trim-and-fill method.

**Table S4. Results of the three supplementary meta-analyses on COVID-19.** The compared tests include the two-sided Egger's test (Reg: two-sided), the two-sided modified regression test (Reg-het: two-sided), Begg's rank test (Rank: two-sided), the trim-and-fill method (T & F), the proposed one-sided Egger's test (Reg: one-sided), and the proposed one-sided modified regression test (Reg-het: one-sided).

|                                       | Lee et al. <sup>1</sup> | Chu et al. <sup>2</sup> | Peckham et al. <sup>3</sup> |
|---------------------------------------|-------------------------|-------------------------|-----------------------------|
| $I^2$ (%)                             | 94                      | 74                      | 97                          |
| Reg: two-sided ( <i>p</i> -value)     | 0.034                   | 0.266                   | 0.001                       |
| Reg-het: two-sided ( <i>p</i> -value) | 0.045                   | 0.211                   | 0.779                       |
| Rank: two-sided ( <i>p</i> -value)    | 0.080                   | 0.156                   | 0.249                       |
| T & F                                 |                         |                         |                             |
| Imputation side                       | Right                   | Right                   | Right                       |
| No. of imputed studies                | 6                       | 4                       | 1                           |
| <i>p</i> -value                       | 0.004                   | 0.031                   | 0.500                       |
| Reg: one-sided ( <i>p</i> -value)     | 0.017                   | 0.133                   | 0.001                       |
| Reg-het: one-sided ( <i>p</i> -value) | 0.023                   | 0.106                   | 0.389                       |

## References

1. Lee ARYB, Wong SY, Chai LYA, et al. Efficacy of covid-19 vaccines in immunocompromised patients: systematic review and meta-analysis. *BMJ* 2022;376:e068632. doi: 10.1136/bmj-2021-068632
2. Chu DK, Akl EA, Duda S, et al. Physical distancing, face masks, and eye protection to prevent person-to-person transmission of SARS-CoV-2 and COVID-19: a systematic review and meta-analysis. *The Lancet* 2020;395(10242):1973-87. doi: 10.1016/S0140-6736(20)31142-9
3. Peckham H, de Grujter NM, Raine C, et al. Male sex identified by global COVID-19 meta-analysis as a risk factor for death and ICU admission. *Nature Communications* 2020;11(1):6317. doi: 10.1038/s41467-020-19741-6
